# Supplementary material
Source: Springer Nature journal article supplement (https://www.springermedizin.de/resource/supplementary/12933_2007_101_MOESM1_ESM.pdf/9539590)
Supplement: MOESM1 [file 9539590]

**Table 5 - Prevalence of the Metabolic Syndrome in GEMCAS according to different definitions by age and sex**

| Age-Group                | TotalN       | Changes compared to NCEP/ATP-III: |             |                                |             |                             |             |                             |             |             |             | IDF/AHA 2005 | $\Delta^{\ddagger}$<br>% |
|--------------------------|--------------|-----------------------------------|-------------|--------------------------------|-------------|-----------------------------|-------------|-----------------------------|-------------|-------------|-------------|--------------|--------------------------|
|                          |              | NCEP/ATP-III 2001                 |             | NCEP/ATP-III mod. <sup>1</sup> |             | AHA/NHLBI 2004 <sup>*</sup> |             | AHA/NHLBI 2005 <sup>*</sup> |             | IDF 2005    |             |              |                          |
|                          |              | %                                 | SD          | %                              | SD          | %                           | SD          | %                           | SD          | %           | SD          |              |                          |
| <b>All</b>               |              |                                   |             |                                |             |                             |             |                             |             |             |             |              |                          |
| 18-29                    | 3541         | 4.3                               | 0.20        | 4.4                            | 0.21        | 4.5                         | 0.21        | 4.8                         | 0.21        | 5.9         | 0.24        | 1.23         | 1.11                     |
| 30-39                    | 4472         | 8.6                               | 0.28        | 9.0                            | 0.29        | 9.5                         | 0.29        | 10.6                        | 0.31        | 12.7        | 0.33        | 1.20         | 2.15                     |
| 40-49                    | 7173         | 13.1                              | 0.34        | 14.0                           | 0.35        | 15.3                        | 0.36        | 17.5                        | 0.38        | 20.2        | 0.40        | 1.16         | 2.73                     |
| 50-59                    | 7404         | 22.4                              | 0.42        | 24.7                           | 0.43        | 27.4                        | 0.45        | 32.8                        | 0.47        | 38.0        | 0.49        | 1.16         | 5.18                     |
| 60-69                    | 5586         | 30.5                              | 0.46        | 33.1                           | 0.47        | 36.2                        | 0.48        | 45.6                        | 0.50        | 51.8        | 0.50        | 1.14         | 6.26                     |
| 70-79                    | 4017         | 34.9                              | 0.48        | 38.6                           | 0.49        | 41.9                        | 0.49        | 53.1                        | 0.50        | 58.9        | 0.49        | 1.11         | 5.73                     |
| 80-99                    | 1116         | 31.9                              | 0.47        | 36.3                           | 0.48        | 39.2                        | 0.49        | 48.4                        | 0.50        | 53.0        | 0.50        | 1.10         | 4.67                     |
| <b>total</b>             | <b>33502</b> | <b>19.8</b>                       | <b>0.40</b> | <b>21.6</b>                    | <b>0.41</b> | <b>23.5</b>                 | <b>0.42</b> | <b>28.6</b>                 | <b>0.45</b> | <b>32.7</b> | <b>0.47</b> |              |                          |
| <b>total<sup>‡</sup></b> |              | <b>18.7</b>                       | <b>0.54</b> | <b>20.3</b>                    | <b>0.55</b> | <b>22.0</b>                 | <b>0.57</b> | <b>26.9</b>                 | <b>0.61</b> | <b>30.7</b> | <b>0.63</b> | <b>1.14</b>  | <b>4.07</b>              |
| $\kappa^{\S}$            |              |                                   |             | 0.96                           |             | 0.91                        |             | 0.80                        |             | 0.68        |             |              |                          |
| $\kappa^{\parallel}$     |              |                                   |             |                                |             |                             |             |                             |             | 0.85        |             |              |                          |
| <b>Men</b>               |              |                                   |             |                                |             |                             |             |                             |             |             |             |              |                          |
| 18-29                    | 1197         | 5.4                               | 0.23        | 5.4                            | 0.23        | 5.5                         | 0.23        | 6.0                         | 0.24        | 7.6         | 0.27        | 1.28         | 1.64                     |
| 30-39                    | 1510         | 11.5                              | 0.32        | 12.0                           | 0.33        | 13.0                        | 0.34        | 14.5                        | 0.35        | 18.3        | 0.39        | 1.27         | 3.87                     |
| 40-49                    | 2471         | 16.8                              | 0.37        | 17.8                           | 0.38        | 19.9                        | 0.40        | 24.5                        | 0.43        | 28.7        | 0.45        | 1.17         | 4.23                     |
| 50-59                    | 2974         | 27.3                              | 0.45        | 29.9                           | 0.46        | 33.4                        | 0.47        | 41.5                        | 0.49        | 48.7        | 0.50        | 1.17         | 7.14                     |
| 60-69                    | 2463         | 31.0                              | 0.46        | 34.0                           | 0.47        | 37.9                        | 0.49        | 49.4                        | 0.50        | 56.3        | 0.50        | 1.14         | 6.95                     |
| 70-79                    | 1771         | 32.2                              | 0.47        | 36.4                           | 0.48        | 39.8                        | 0.49        | 51.9                        | 0.50        | 58.8        | 0.49        | 1.13         | 6.88                     |
| 80-99                    | 383          | 26.1                              | 0.44        | 31.4                           | 0.46        | 34.2                        | 0.48        | 45.8                        | 0.50        | 52.0        | 0.50        | 1.14         | 6.19                     |
| <b>total</b>             | <b>12838</b> | <b>22.7</b>                       | <b>0.42</b> | <b>24.9</b>                    | <b>0.43</b> | <b>27.5</b>                 | <b>0.45</b> | <b>34.8</b>                 | <b>0.48</b> | <b>40.3</b> | <b>0.49</b> |              |                          |
| <b>total<sup>‡</sup></b> |              | <b>19.5</b>                       | <b>0.61</b> | <b>21.2</b>                    | <b>0.63</b> | <b>23.3</b>                 | <b>0.65</b> | <b>29.2</b>                 | <b>0.70</b> | <b>34.1</b> | <b>0.73</b> | <b>1.16</b>  | <b>5.57</b>              |
| $\kappa^{\S}$            |              |                                   |             | 0.96                           |             |                             |             |                             |             |             |             |              |                          |
| $\kappa^{\parallel}$     |              |                                   |             |                                |             |                             |             |                             |             | 0.79        |             |              |                          |

| Age-Group                | TotalN       | Changes compared to NCEP/ATP-III:<br>hypertensive treatment included    glucose cut off reduced    drug treatment introduced    Increased waist required and waist cut off reduced |             |                                |             |                 |             |                 |             |             |             | IDF/AHA 2005 | $\Delta^{\ddagger}$<br>% |
|--------------------------|--------------|------------------------------------------------------------------------------------------------------------------------------------------------------------------------------------|-------------|--------------------------------|-------------|-----------------|-------------|-----------------|-------------|-------------|-------------|--------------|--------------------------|
|                          |              | NCEP/ATP-III 2001                                                                                                                                                                  |             | NCEP/ATP-III mod. <sup>1</sup> |             | AHA/NHLBI 2004* |             | AHA/NHLBI 2005* |             | IDF 2005    |             |              |                          |
|                          |              | %                                                                                                                                                                                  | SD          | %                              | SD          | %               | SD          | %               | SD          | %           | SD          |              |                          |
| <b>Women</b>             |              |                                                                                                                                                                                    |             |                                |             |                 |             |                 |             |             |             |              |                          |
| 18-29                    | 2344         | 3.8                                                                                                                                                                                | 0.19        | 3.9                            | 0.19        | 4.0             | 0.20        | 4.2             | 0.20        | 5.0         | 0.22        | 1.20         | 0.84                     |
| 30-39                    | 2962         | 7.2                                                                                                                                                                                | 0.26        | 7.5                            | 0.26        | 7.8             | 0.27        | 8.6             | 0.28        | 9.8         | 0.30        | 1.15         | 1.25                     |
| 40-49                    | 4702         | 11.1                                                                                                                                                                               | 0.31        | 12.1                           | 0.33        | 12.9            | 0.33        | 13.8            | 0.35        | 15.8        | 0.36        | 1.14         | 1.97                     |
| 50-59                    | 4430         | 19.1                                                                                                                                                                               | 0.39        | 21.2                           | 0.41        | 23.4            | 0.42        | 27.0            | 0.44        | 30.8        | 0.46        | 1.14         | 3.87                     |
| 60-69                    | 3123         | 30.2                                                                                                                                                                               | 0.46        | 32.4                           | 0.47        | 34.9            | 0.48        | 42.6            | 0.49        | 48.3        | 0.50        | 1.13         | 5.7                      |
| 70-79                    | 2246         | 36.9                                                                                                                                                                               | 0.48        | 40.4                           | 0.49        | 43.5            | 0.50        | 54.1            | 0.50        | 58.9        | 0.49        | 1.09         | 4.84                     |
| 80-99                    | 733          | 35.0                                                                                                                                                                               | 0.48        | 38.9                           | 0.49        | 41.8            | 0.49        | 49.7            | 0.50        | 53.6        | 0.50        | 1.08         | 3.89                     |
| <b>total</b>             | <b>20664</b> | <b>18.0</b>                                                                                                                                                                        | <b>0.38</b> | <b>19.6</b>                    | <b>0.40</b> | <b>21.0</b>     | <b>0.41</b> | <b>24.8</b>     | <b>0.43</b> | <b>28.0</b> | <b>0.45</b> |              |                          |
| <b>total<sup>‡</sup></b> |              | <b>18.0</b>                                                                                                                                                                        | <b>0.49</b> | <b>19.5</b>                    | <b>0.50</b> | <b>20.9</b>     | <b>0.51</b> | <b>24.8</b>     | <b>0.55</b> | <b>27.7</b> | <b>0.57</b> | <b>1.13</b>  | <b>3.12</b>              |
| $\kappa^{\S}$            |              |                                                                                                                                                                                    |             | 0.96                           |             | 0.92            |             | 0.83            |             | 0.74        |             |              |                          |
| $\kappa^{\parallel}$     |              |                                                                                                                                                                                    |             |                                |             |                 |             |                 |             | 0.89        |             |              |                          |

<sup>1</sup> Modification of the original NCEP/ATP-III-definition, considering subjects using hypertensive medication as having MetSyn

\* often cited as NCEP ATP III-definition

<sup>†</sup> AHA 2005-IDF 2005

<sup>‡</sup> age standardized according to German population (destatis 2005)

<sup>§</sup> kappa of accordance between prevalence of NCEP/ATP-III and following definitions

<sup>||</sup> kappa of accordance between prevalence of AHA/NHLBI (2005) and IDF-definition
